# Supplementary material
Source: MDPI journal article supplement (https://www.mdpi.com/2073-4433/12/12/1676)
Supplement: s1 [file s1 › atmosphere-1494490-supplementary.pdf]

# Supplementary Materials: Contributions of Ammonia to High Concentrations of PM<sub>2.5</sub> in an Urban Area

Junsu Park<sup>1</sup>, Eunhye Kim<sup>2</sup>, Sangmin Oh<sup>1</sup>, Haeri Kim<sup>1</sup>, Soontae Kim<sup>2</sup>, Yong Pyo Kim<sup>3</sup>, and Mijung Song<sup>1,4,\*</sup>

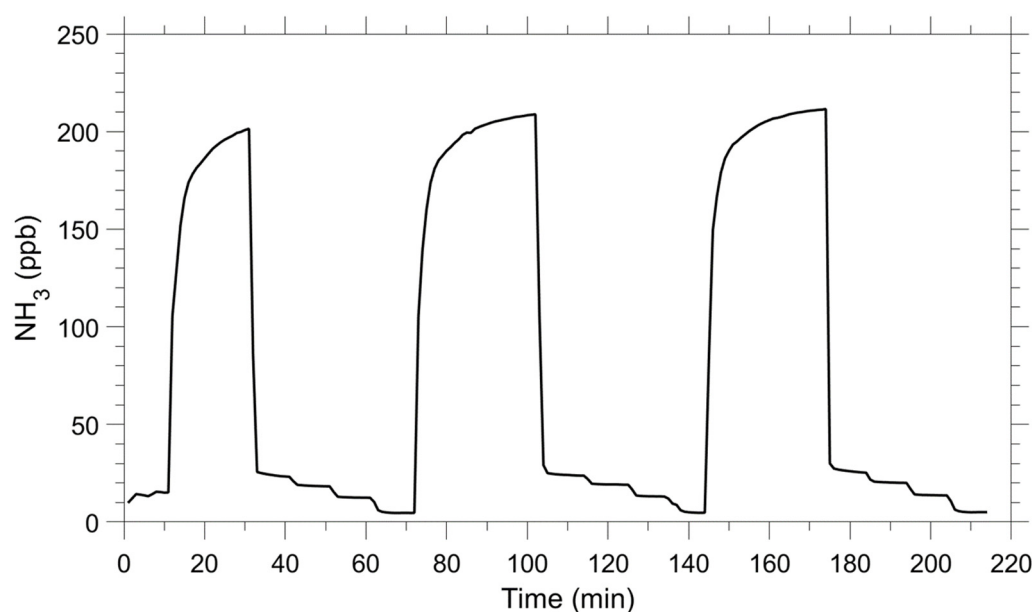

**Figure S1.** Calibration of the NH<sub>3</sub> analyzer using a diluted standard gas mixture of NH<sub>3</sub> and N<sub>2</sub>.

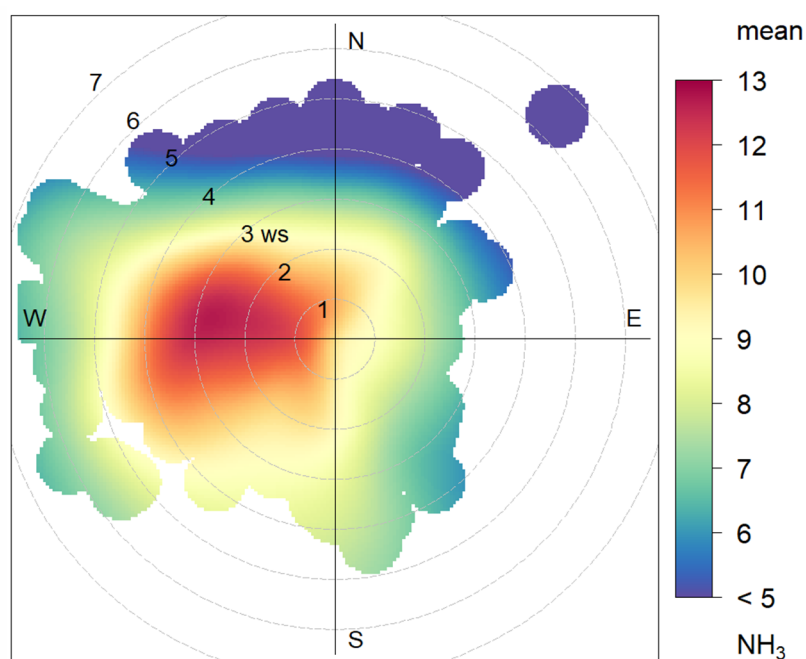

**Figure S2.** A result of polar plot during measuring period in Jeonju. Red color represents high NH<sub>3</sub> concentrations.

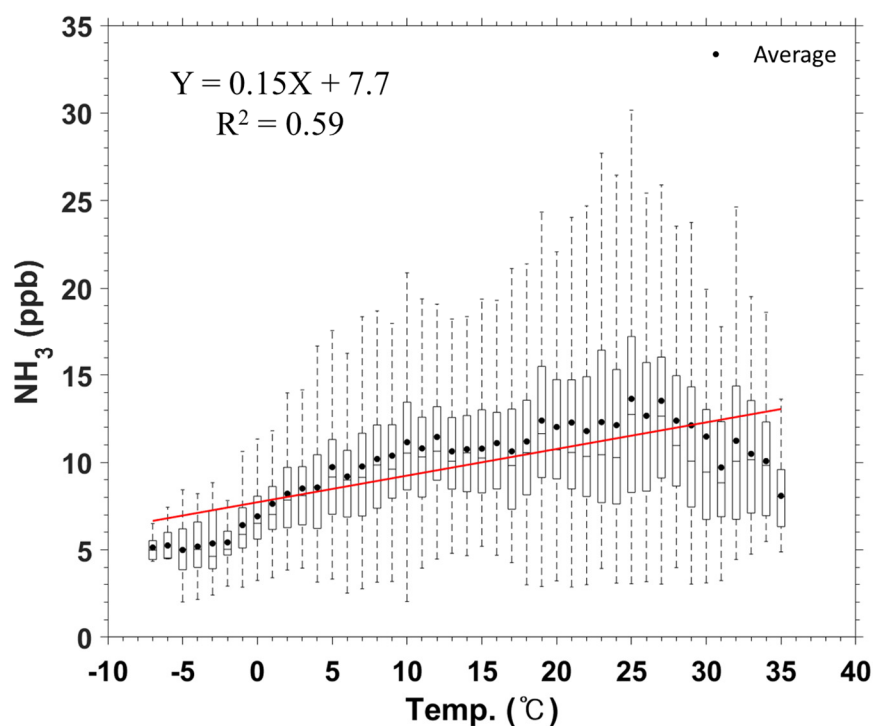

**Figure S3.** Relationship between hourly  $\text{NH}_3$  concentrations and ambient temperature at the Samcheon-dong monitoring station during May 2019 to April 2020.

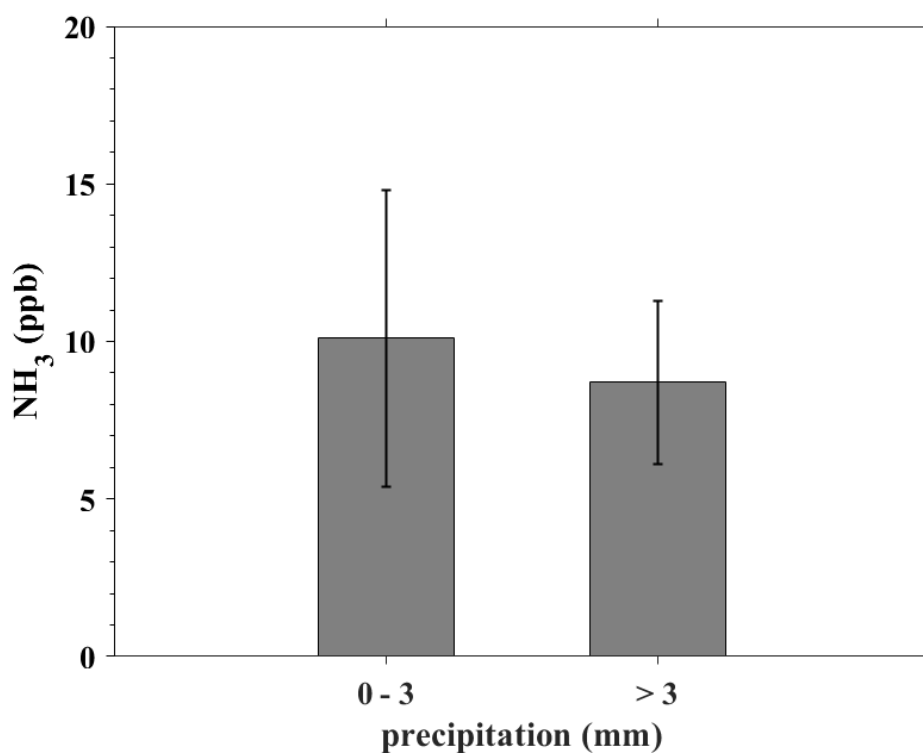

**Figure S4.** Hourly averaged concentration of  $\text{NH}_3$  versus the precipitation per hour during the measuring period (temperature > 30 °C).

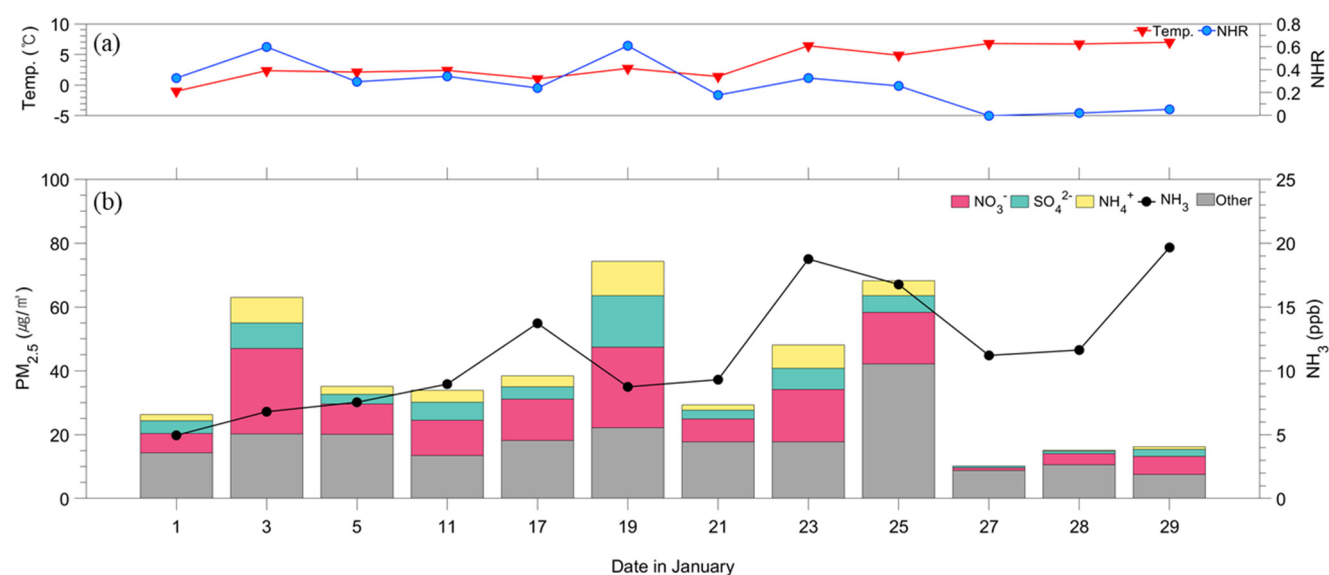

**Figure S5.** Monthly variation in (a) temperature and the ratio of  $\text{NH}_4^+$  to total  $\text{NH}_3$  (NHR) and (b) concentrations of  $\text{NH}_3$ , SNA, and  $\text{PM}_{2.5}$  at the monitoring site in January 2020.

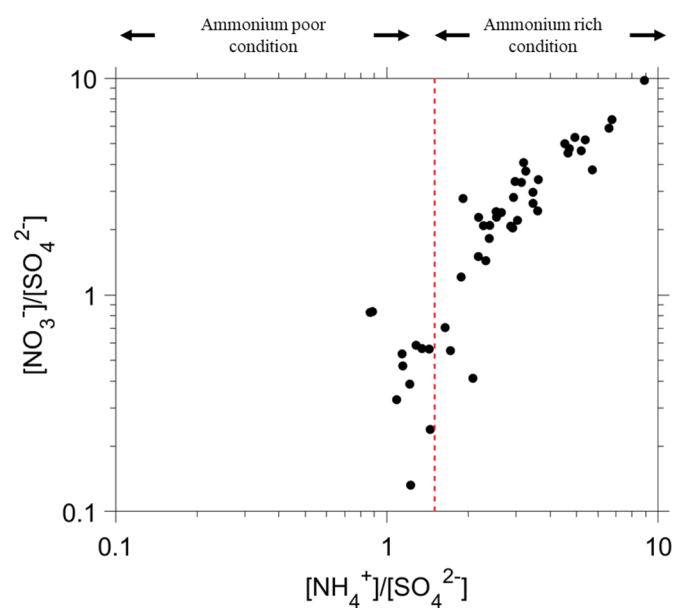

**Figure S6.** A result of ammonium-poor and ammonium-rich conditions during polluted periods.

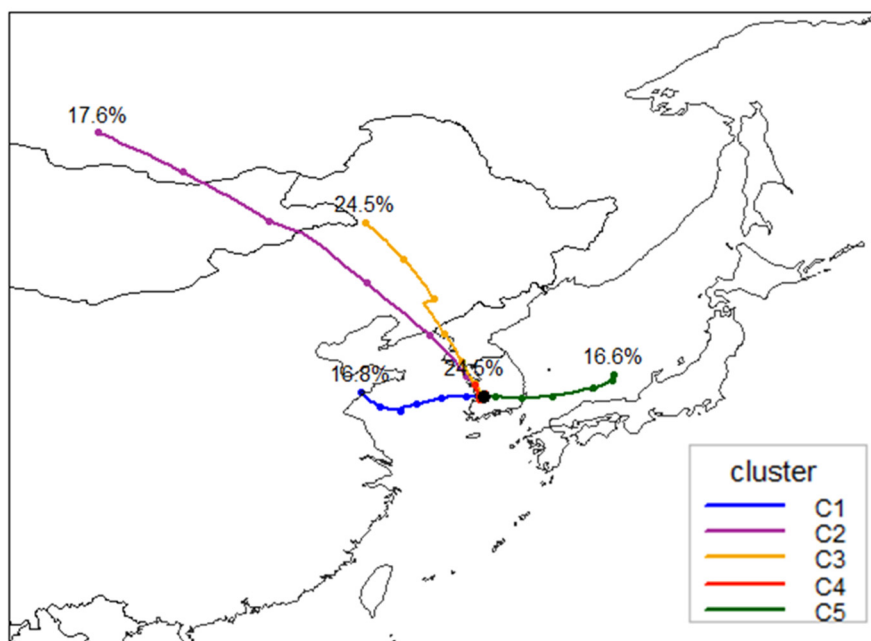

**Figure S7.** Cluster analysis for 72 h backward trajectories at the monitoring site from May 2019 to April 2020.

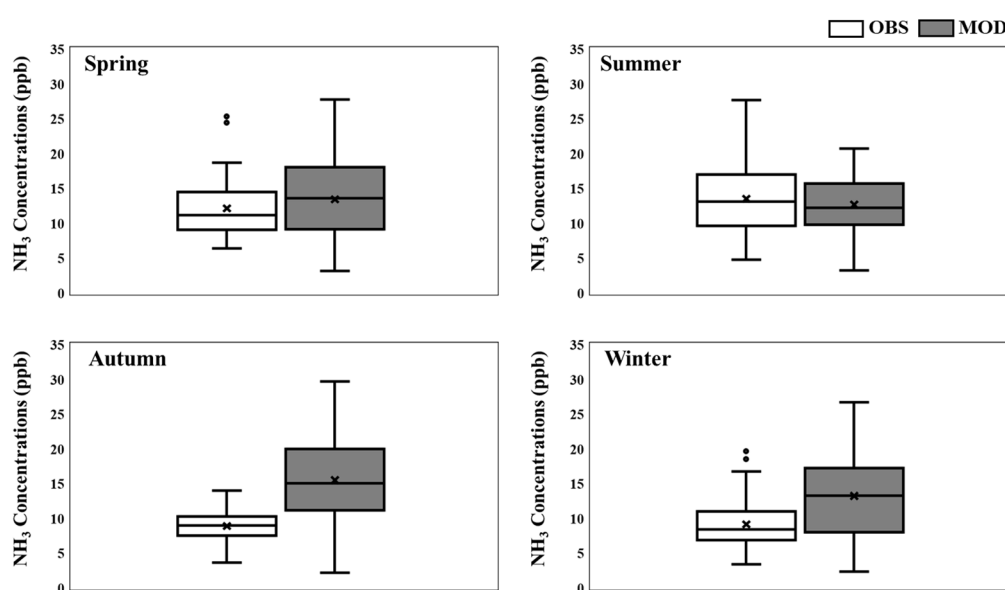

**Figure S8.** Seasonally observed (left) and simulated (right) ammonia ( $\text{NH}_3$ ) concentrations in Samcheon-dong. The lines represent the maximum, 75th quartile, median, 25th quartile and the minimum values of the data. The crosses indicate the average of the data and the circles indicate outliers.

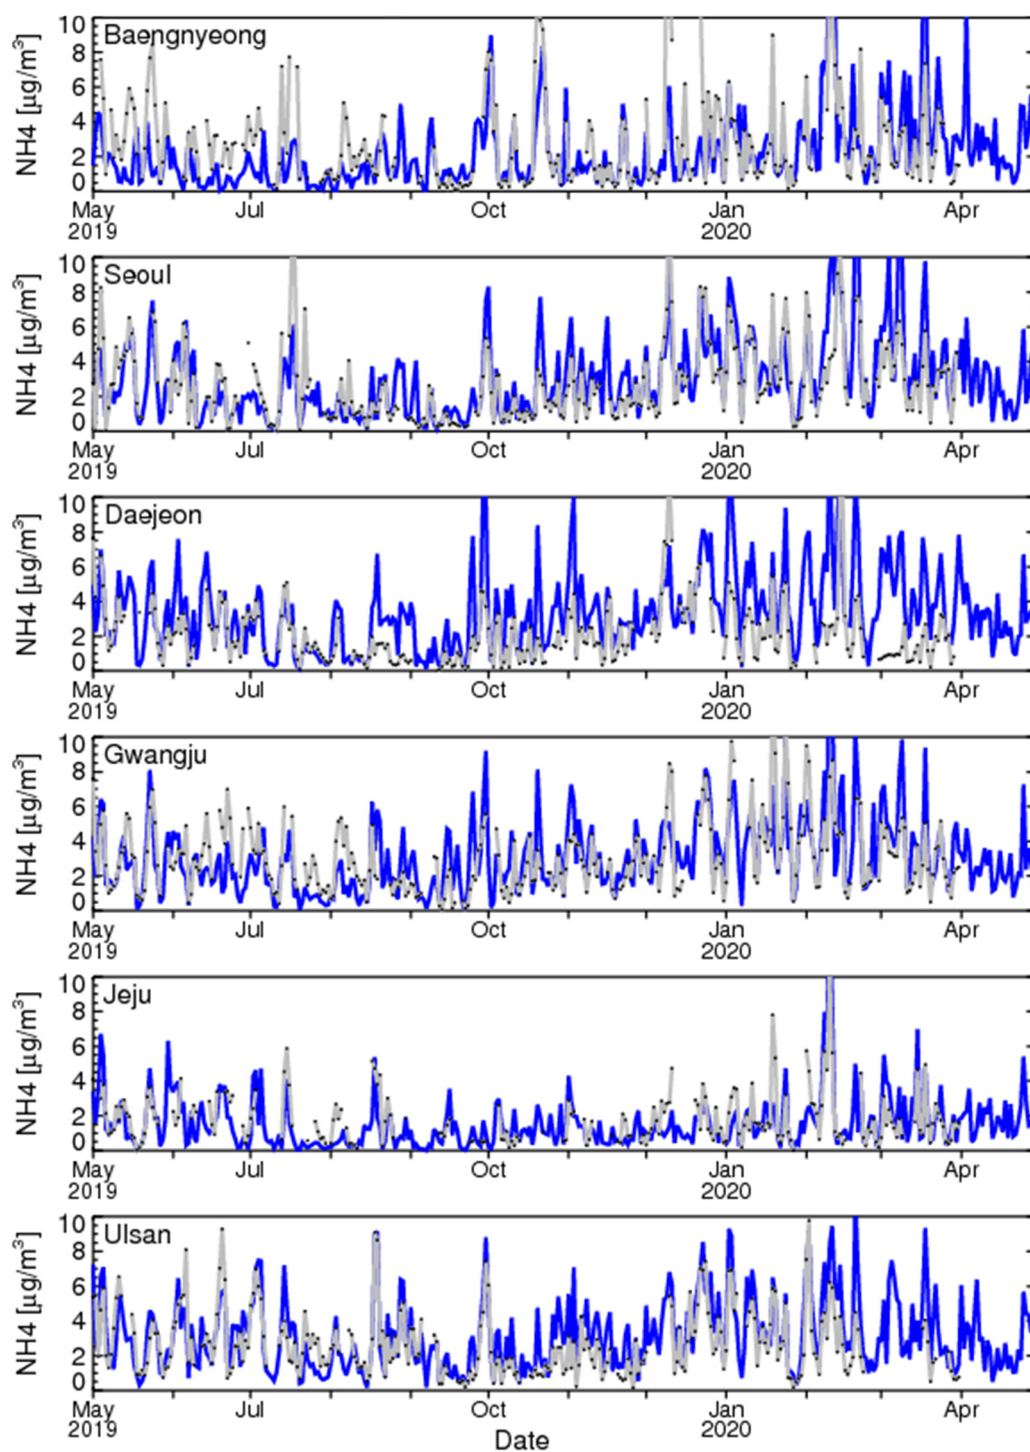

**Figure S9.** Time series for the observed and simulated  $\text{NH}_4^+$  concentrations in the six supersites (Baengnyeong, Seoul, Daejeon, Gwangju, Jeju, and Ulsan) in South Korea from May 2019 to April 2020.

**Table S1.** Monthly average concentrations of PM<sub>2.5</sub> and its ionic species, and NH<sub>3</sub>, and meteorological conditions in Jeonju from May 2019 to April 2020.

| Date            | NH <sub>3</sub><br>(ppb) | PM <sub>2.5</sub><br>(µg/m <sup>3</sup> ) | SO <sub>4</sub> <sup>2-</sup><br>(µg/m <sup>3</sup> ) | NO <sub>3</sub> <sup>-</sup><br>(µg/m <sup>3</sup> ) | NH <sub>4</sub> <sup>+</sup><br>(µg/m <sup>3</sup> ) | NHR<br>(%) | Temperature<br>(°C) | RH<br>(%) | Wind<br>speed<br>(m/s) | Wind di-<br>rection<br>(°) | Total<br>Precipi-<br>tation<br>(mm) | Col-<br>lected<br>PM <sub>2.5</sub> fil-<br>ters<br>(#) |
|-----------------|--------------------------|-------------------------------------------|-------------------------------------------------------|------------------------------------------------------|------------------------------------------------------|------------|---------------------|-----------|------------------------|----------------------------|-------------------------------------|---------------------------------------------------------|
| 2019-<br>May    | 14.1 ± 6.4               | 19.7 ± 8.4                                | 5.0 ± 3.3                                             | 1.3 ± 0.9                                            | 1.1 ± 0.9                                            | 8.1        | 19.5                | 54.1      | 1.7                    | 220                        | 45.6                                | 20                                                      |
| Jun             | 17.1 ± 5.4               | 28.1 ± 13.8                               | 8.0 ± 4.8                                             | 3.5 ± 4.4                                            | 1.9 ± 1.9                                            | 11.4       | 22.1                | 71.8      | 1.6                    | 220                        | 89.1                                | 10                                                      |
| Aug             | 9.8 ± 3.6                | 16.5 ± 3.2                                | 4.4 ± 0.2                                             | 0.5 ± 0.1                                            | 0.6 ± 0.1                                            | 7.7        | 27.3                | 75.4      | 1.5                    | 210                        | 117.7                               | 3                                                       |
| Sep             | 8.9 ± 3.2                | 14.1 ± 8.7                                | 3.7 ± 2.9                                             | 0.6 ± 0.5                                            | 0.5 ± 1.0                                            | 5.2        | 23.0                | 77.3      | 1.3                    | 220                        | 194.8                               | 5                                                       |
| Oct             | 8.8 ± 2.6                | 18.1 ± 8.4                                | 3.2 ± 1.8                                             | 2.4 ± 2.7                                            | 0.7 ± 1.0                                            | 7.2        | 16.6                | 73.7      | 1.3                    | 220                        | 73.0                                | 23                                                      |
| Nov             | 9.0 ± 3.4                | 24.8 ± 9.9                                | 3.7 ± 1.5                                             | 3.9 ± 2.3                                            | 1.2 ± 0.9                                            | 11.4       | 9.8                 | 67.3      | 1.5                    | 210                        | 57.0                                | 10                                                      |
| Dec             | 8.1 ± 2.9                | 23.6 ± 9.0                                | 3.2 ± 1.0                                             | 6.3 ± 3.5                                            | 1.8 ± 1.3                                            | 20.1       | 4.2                 | 63.0      | 1.5                    | 210                        | 30.6                                | 7                                                       |
| 2020-<br>Jan    | 9.9 ± 5.2                | 38.1 ± 20.3                               | 4.9 ± 4.0                                             | 11.8 ± 7.8                                           | 3.8 ± 3.2                                            | 27.2       | 3.5                 | 70.5      | 1.3                    | 210                        | 76.8                                | 12                                                      |
| Feb             | 9.7 ± 4.3                | 30.1 ± 10.0                               | 4.9 ± 2.3                                             | 7.7 ± 3.7                                            | 2.5 ± 1.5                                            | 23.6       | 4.2                 | 68.3      | 1.5                    | 210                        | 65.9                                | 9                                                       |
| Mar             | 11.4 ± 3.9               | 29.0 ± 10.5                               | 3.9 ± 1.8                                             | 6.6 ± 4.3                                            | 2.1 ± 1.3                                            | 18.5       | 8.2                 | 59.9      | 1.8                    | 220                        | 25.4                                | 12                                                      |
| Apr             | 9.5 ± 2.5                | 18.4 ± 4.3                                | 2.2 ± 0.8                                             | 3.6 ± 1.8                                            | 0.7 ± 0.6                                            | 10.7       | 9.1                 | 54.6      | 1.7                    | 220                        | 0                                   | 7                                                       |
| Whole<br>period | 10.5 ± 4.8               | 24.0 ± 12.9                               | 4.3 ± 3.1                                             | 4.4 ± 4.9                                            | 1.6 ± 1.8                                            | 13.3       | 13.6                | 67.6      | 1.5                    | 220                        | 775.9                               | 118                                                     |

**Table S2.** Model performance evaluation for  $\text{NH}_4^+$  concentrations in the six supersites (Baengnyeong, Seoul, Daejeon, Gwangju, Jeju, and Ulsan) in South Korea from May 2019 to April 2020.

| SITE        | NDATA | MEAN1<br>(OBS) | MEAN2<br>(MOD) | MB    | RMSE | IOA  | NME   | NMB    | FB     | FE    | R    |
|-------------|-------|----------------|----------------|-------|------|------|-------|--------|--------|-------|------|
| Baengnyeong | 272   | 2.75           | 2.2            | -0.55 | 2.24 | 0.77 | 52.00 | -19.93 | -18.02 | 58.6  | 0.62 |
| Seoul       | 299   | 2.73           | 3.06           | 0.32  | 1.64 | 0.87 | 41.19 | 11.88  | 13.33  | 42.73 | 0.77 |
| Daejeon     | 274   | 2.11           | 3.51           | 1.4   | 2.46 | 0.65 | 84.31 | 66.48  | 50.07  | 65.09 | 0.56 |
| Gwangju     | 293   | 3.1            | 3.23           | 0.12  | 1.76 | 0.82 | 41.94 | 3.99   | 1.53   | 46.15 | 0.68 |
| Ulsan       | 275   | 2.73           | 3.31           | 0.58  | 1.49 | 0.86 | 41.25 | 21.26  | 18.49  | 42.27 | 0.79 |
| Jeju        | 215   | 1.85           | 1.71           | -0.14 | 1.21 | 0.84 | 46.33 | -7.47  | -13.6  | 51.9  | 0.73 |

MEAN1 (OBS), the mean of the observed values; MEAN2 (MOD), the mean of the simulated values; Mean Bias (MB); Normalized Mean Error (NME); Normalized Mean Bias (NMB); Fractional Bias (FB); Fractional Error (FE); Pearson Correlation coefficient
